# Supplementary material for: Conformational Changes and Unfolding of β-Amyloid Substrates in the Active Site of γ-Secretase
Source: MDPI journal article supplement (doi:10.3390/ijms25052564), 2024-02-22
Supplement: s1 [file s1]

## Supplementary materials

# Conformational changes and unfolding of $\beta$ -amyloid substrates in the active site of $\gamma$ -secretase

Jakub Jakowiecki, Urszula Orzeł, Przemysław Miszt, Krzysztof Młynarczyk, Sławomir Filipek

### Contents

**Figures S1–S4:** Plots of force and work/energy for SMD simulations during unfolding of  $A\beta_{49}$ ,  $A\beta_{46}$ ,  $A\beta_{43}$ , and  $A\beta_{40}$  in GS, respectively.

**Figures S5–S8:** Timeline plots for SMD simulations during unfolding of  $A\beta_{49}$ ,  $A\beta_{46}$ ,  $A\beta_{43}$ , and  $A\beta_{40}$  in GS, respectively.

**Tables S1–S4:** Calculated work/energy and distances for SMD simulations during unfolding of  $A\beta_{49}$ ,  $A\beta_{46}$ ,  $A\beta_{43}$ , and  $A\beta_{40}$  in GS, respectively.

**Table S5.** Tokens to individual SMD simulations for GS-SMD server results page.

**Figure S1.** Plots of force (on left) and work/energy (on right) for eight SMD simulations (repeats) of unfolding of A $\beta$ <sub>49</sub>. The vertical orange line indicates a frame with the closest distance of scissile bond to the catalytic residues (trimming conditions). Units: Force [pN], Work [kJ/mol], Time [ns].

## Trimming A $\beta$ <sub>49</sub> to A $\beta$ <sub>46</sub>

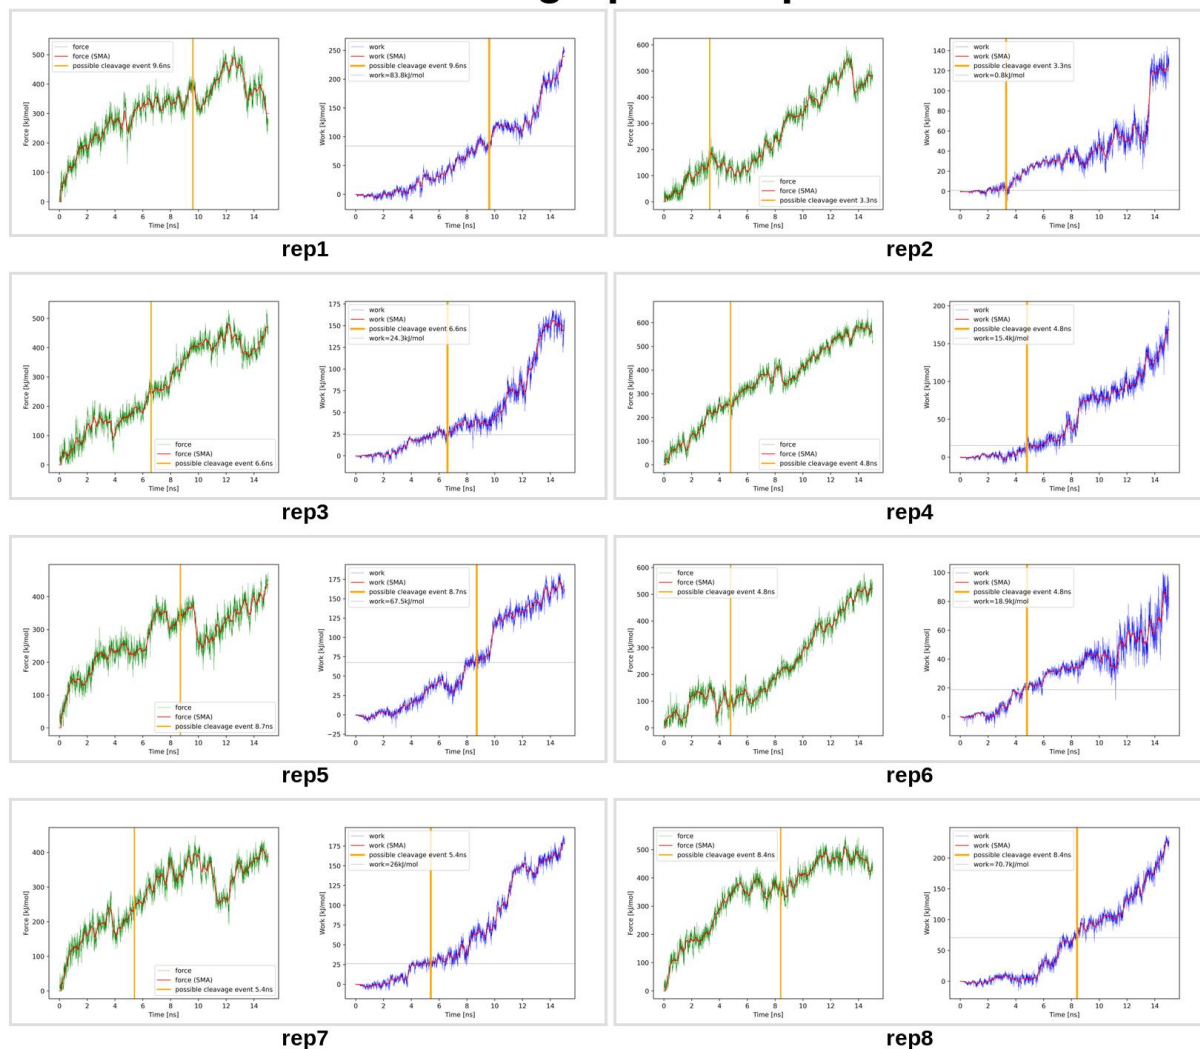

**Figure S2.** Plots of force (on left) and work/energy (on right) for eight SMD simulations (repeats) of unfolding of A $\beta$ <sub>46</sub>. The vertical orange line indicates a frame with the closest distance of scissile bond to the catalytic residues (trimming conditions). Units: Force [pN], Work [kJ/mol], Time [ns].

## Trimming A $\beta$ <sub>46</sub> to A $\beta$ <sub>43</sub>

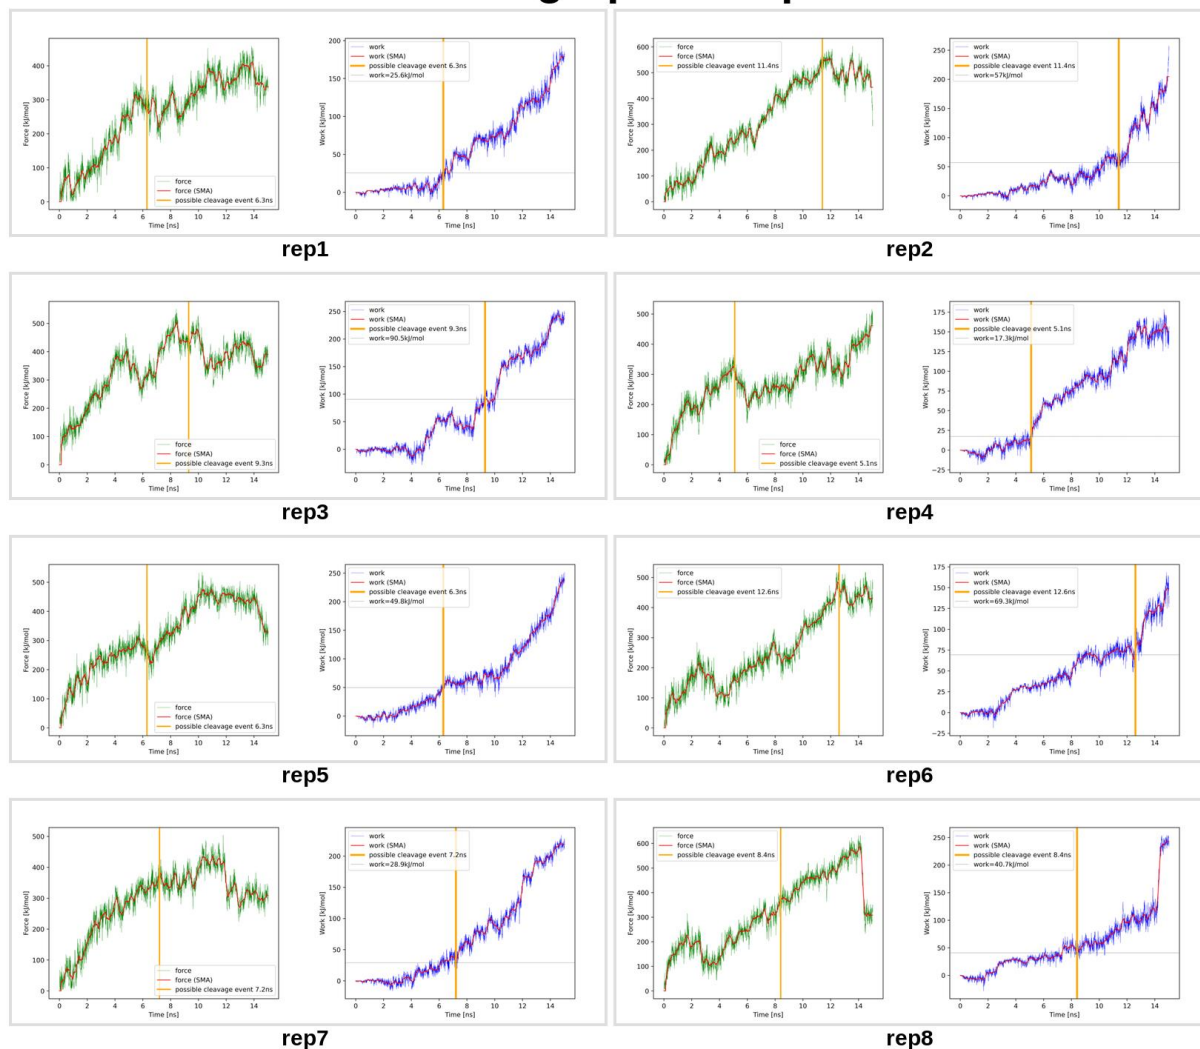

**Figure S3.** Plots of force (on left) and work/energy (on right) for eight SMD simulations (repeats) of unfolding of A $\beta$ <sub>43</sub>. The vertical orange line indicates a frame with the closest distance of scissile bond to the catalytic residues (trimming conditions). Units: Force [pN], Work [kJ/mol], Time [ns].

## Trimming A $\beta$ <sub>43</sub> to A $\beta$ <sub>40</sub>

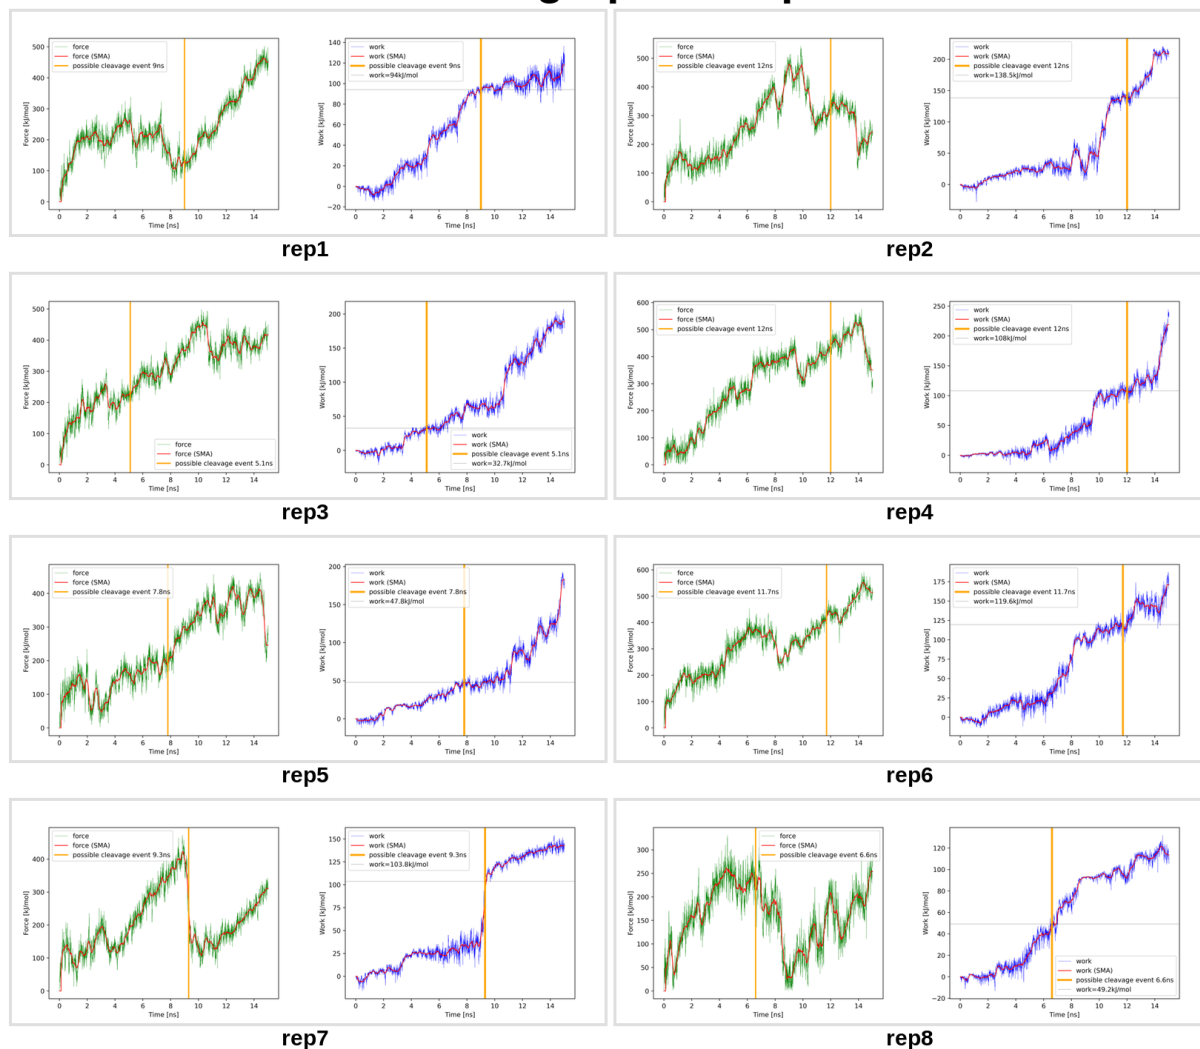

**Figure S4.** Plots of force (on left) and work/energy (on right) for eight SMD simulations (repeats) of unfolding of A $\beta$ <sub>40</sub>. The vertical orange line indicates a frame with the closest distance of scissile bond to the catalytic residues (trimming conditions). Units: Force [pN], Work [kJ/mol], Time [ns].

## Trimming A $\beta$ <sub>40</sub> to A $\beta$ <sub>37</sub>

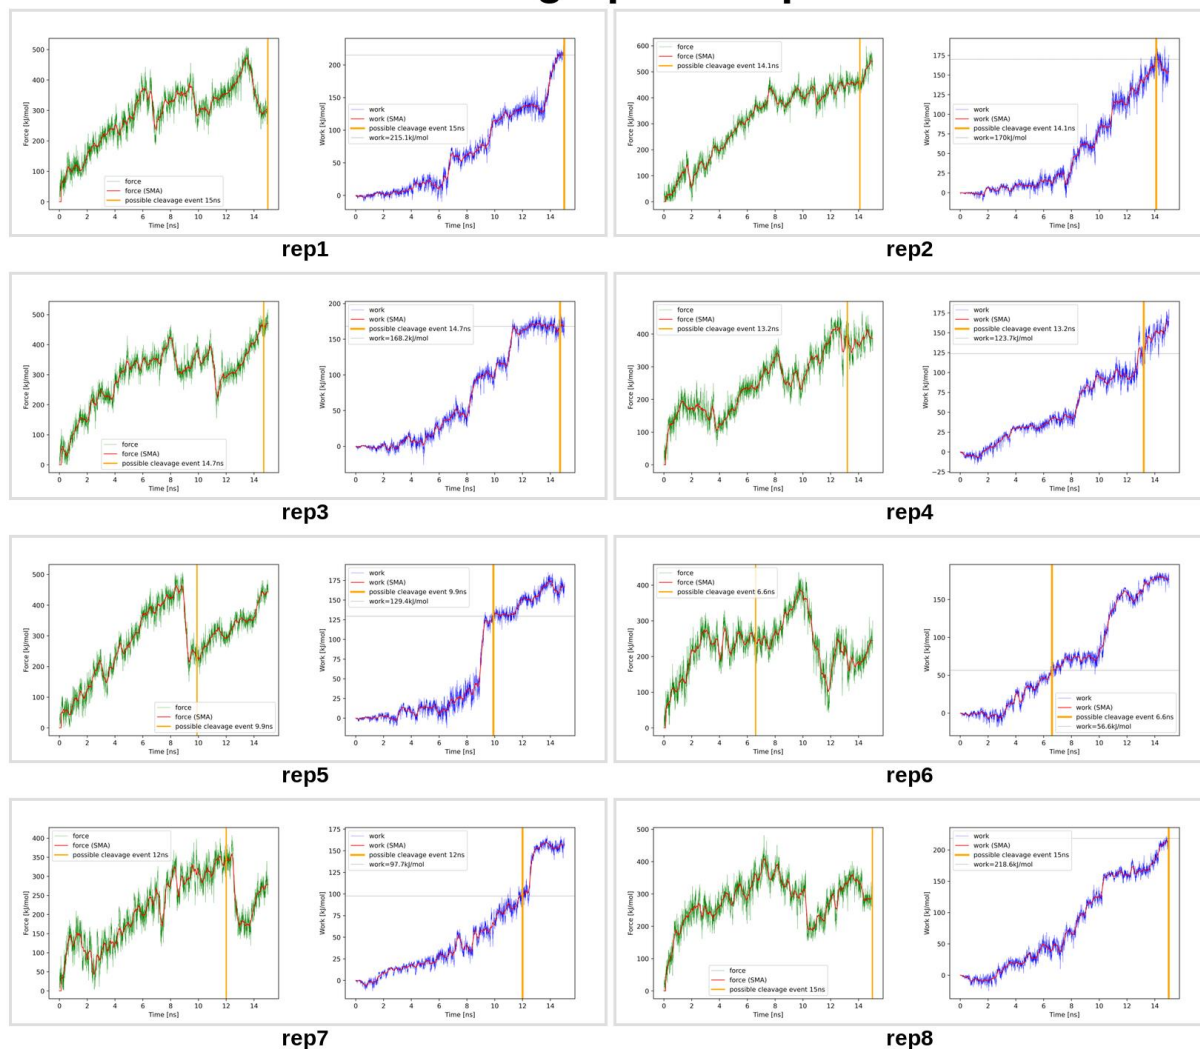

**Figure S5.** Timelines showing the secondary structure of A $\beta$ <sub>49</sub> during its unfolding. The last residue (33) is Leu49. The white window indicates a frame with the closest distance of scissile bond to the catalytic residues (trimming conditions).

Abbreviations: T – Turn, C – Coil, B – Bridge, E – Strand, I –  $\pi$ -Helix, G –  $3_{10}$ -Helix, H –  $\alpha$ -Helix.

## Trimming A $\beta$ <sub>49</sub> to A $\beta$ <sub>46</sub>

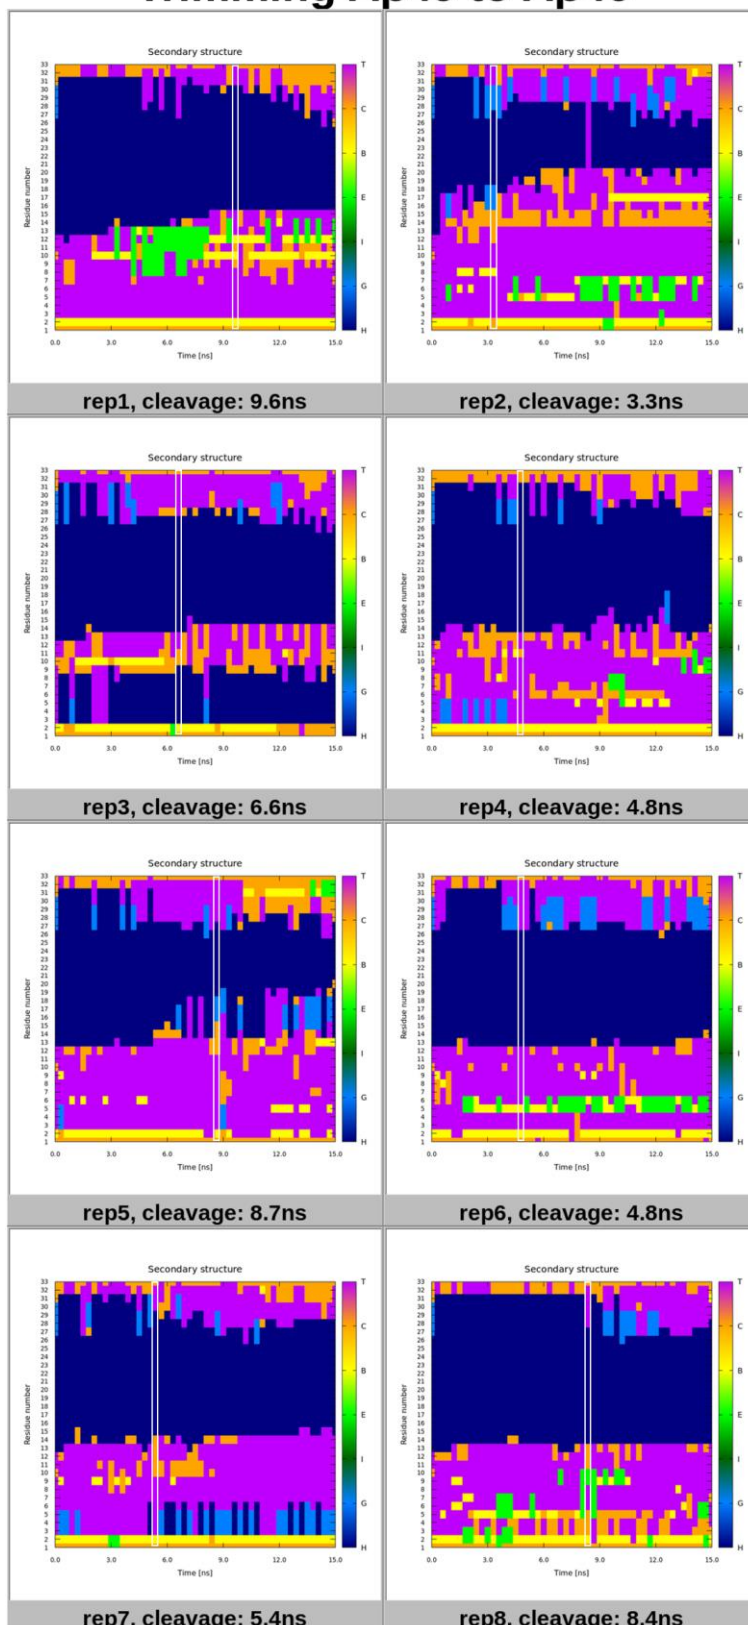



**Figure S6.** Timelines showing the secondary structure of A $\beta$ <sub>46</sub> during its unfolding. The last residue (33) is Val46. The white window indicates a frame with the closest distance of scissile bond to the catalytic residues (trimming conditions).

Abbreviations: T – Turn, C – Coil, B – Bridge, E – Strand, I –  $\pi$ -Helix, G –  $3_{10}$ -Helix, H –  $\alpha$ -Helix.

## Trimming A $\beta$ <sub>46</sub> to A $\beta$ <sub>43</sub>

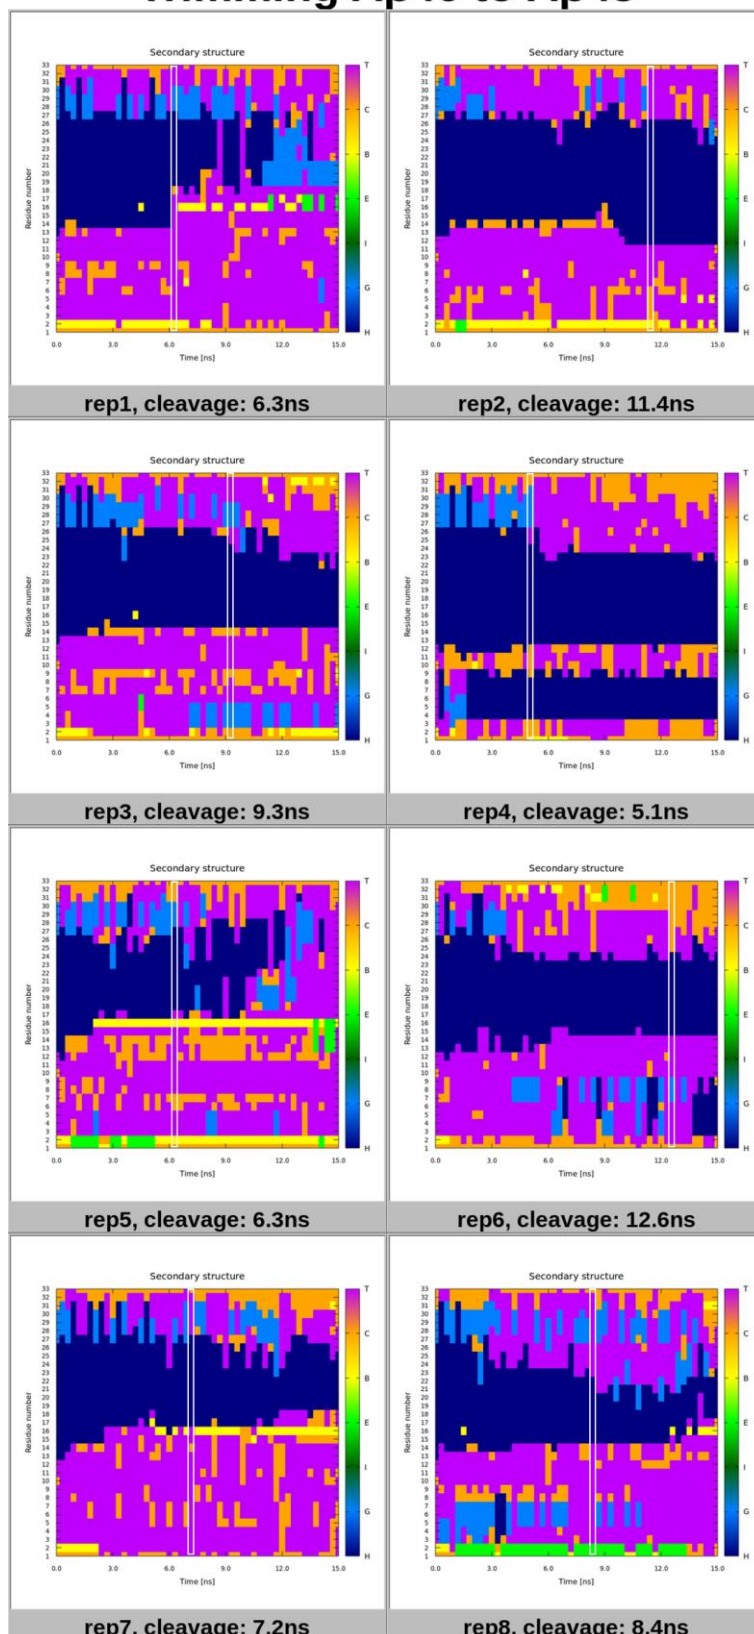

**Figure S7.** Timelines showing the secondary structure of A $\beta$ <sub>43</sub> during its unfolding. The last residue (33) is Thr43. The white window indicates a frame with the closest distance of scissile bond to the catalytic residues (trimming conditions).

Abbreviations: T – Turn, C – Coil, B – Bridge, E – Strand, I –  $\pi$ -Helix, G –  $3_{10}$ -Helix, H –  $\alpha$ -Helix.

## Trimming A $\beta$ <sub>43</sub> to A $\beta$ <sub>40</sub>

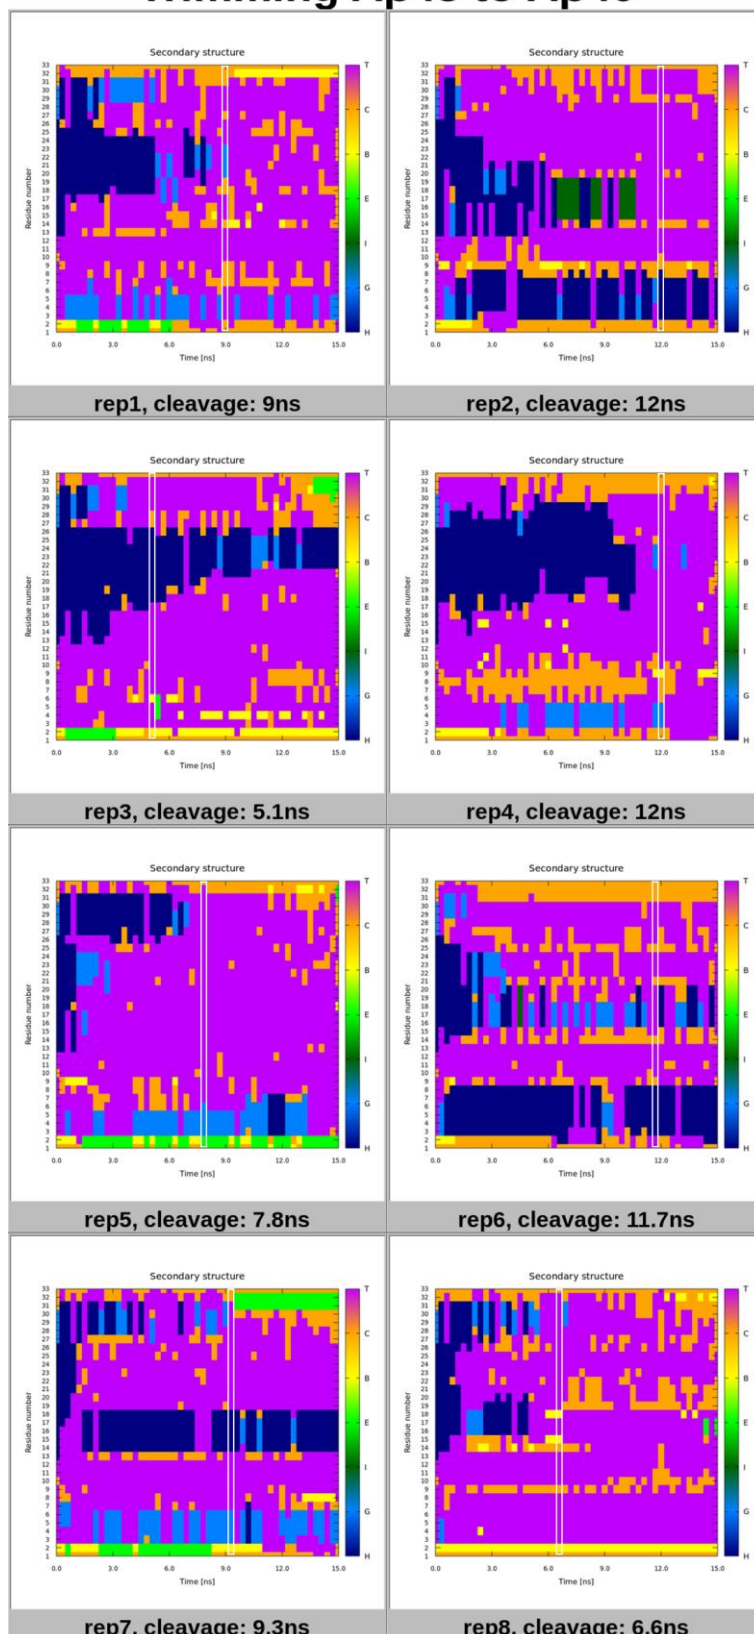



**Figure S8.** Timelines showing the secondary structure of A $\beta$ <sub>40</sub> during its unfolding. The last residue (33) is Val40. The white window indicates a frame with the closest distance of scissile bond to the catalytic residues (trimming conditions).

Abbreviations: T – Turn, C – Coil, B – Bridge, E – Strand, I –  $\pi$ -Helix, G –  $3_{10}$ -Helix, H –  $\alpha$ -Helix.

## Trimming A $\beta$ <sub>40</sub> to A $\beta$ <sub>37</sub>

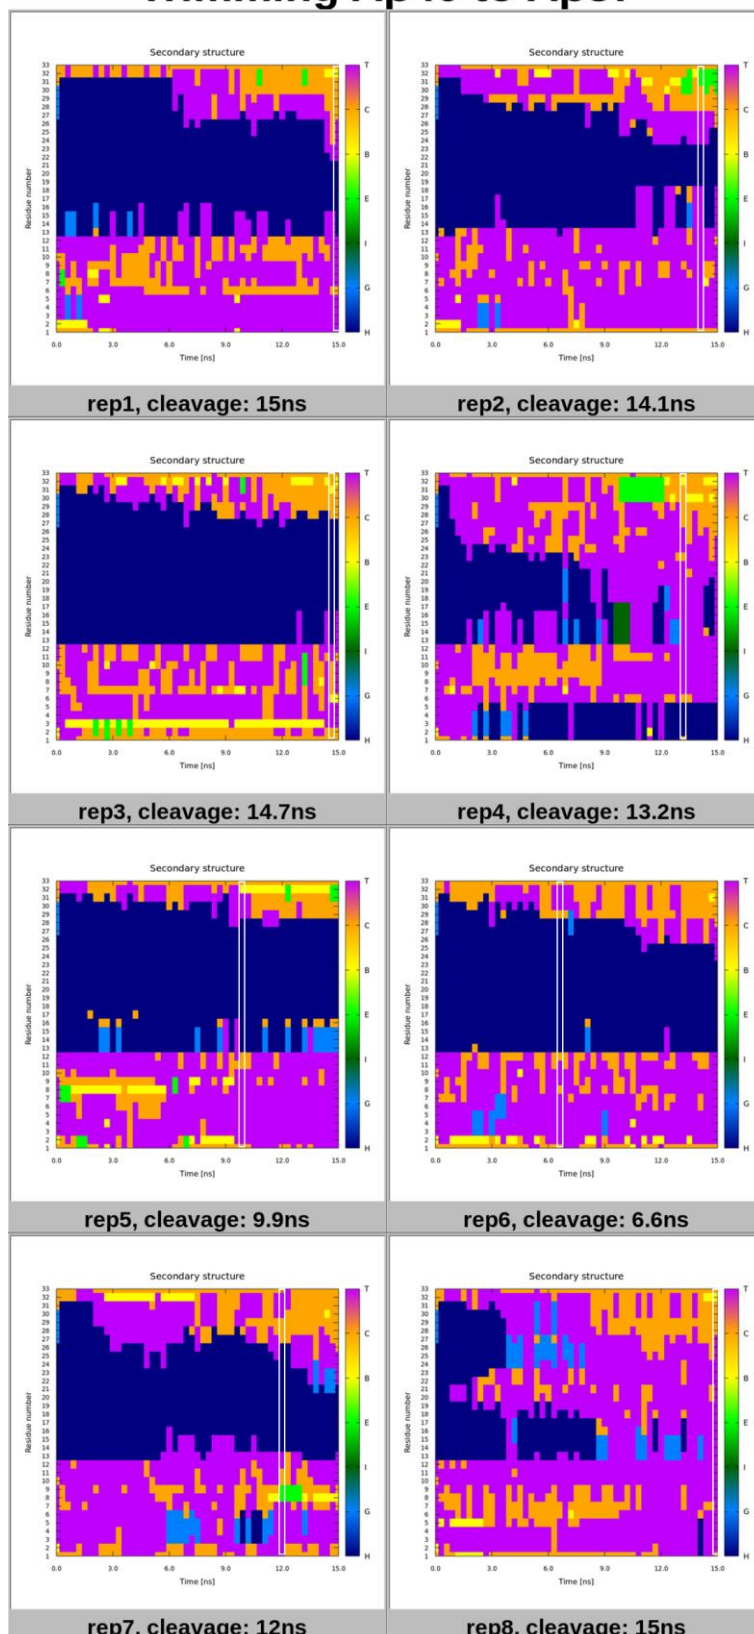

**Table S1.** Calculated work/energy and distances for SMD simulations of unfolding of A $\beta$ <sub>49</sub> in GS. For each simulation the work/energy is calculated for that frame with the shortest sum of distances of Val46 (n-3 residue, scissile bond) to the catalytic residues (Asp257 and Asp385). Distances are given in [Å].

| Trimming 1. A $\beta$ <sub>49</sub> →A $\beta$ <sub>46</sub> |       |           |               |              |              |                           |               |
|--------------------------------------------------------------|-------|-----------|---------------|--------------|--------------|---------------------------|---------------|
| Sim no.                                                      | Frame | Time [ns] | Work [kJ/mol] | Val46–Asp257 | Val46–Asp385 | Shortest sum of distances | Asp257–Asp385 |
| 1                                                            | 32    | 9.6       | 83.8          | 3.97         | 6.80         | 10.77                     | 7.21          |
| 2                                                            | 11    | 3.3       | 0.8           | 4.20         | 6.29         | 10.49                     | 6.34          |
| 3                                                            | 22    | 6.6       | 24.3          | 4.66         | 6.13         | 10.79                     | 6.27          |
| 4                                                            | 16    | 4.8       | 15.4          | 5.71         | 4.35         | 10.06                     | 3.82          |
| 5                                                            | 29    | 8.7       | 67.5          | 3.51         | 6.60         | 10.11                     | 7.79          |
| 6                                                            | 16    | 4.8       | 18.9          | 5.19         | 4.09         | 9.28                      | 5.70          |
| 7                                                            | 18    | 5.4       | 26.0          | 4.80         | 3.87         | 8.67                      | 5.99          |
| 8                                                            | 28    | 8.4       | 70.7          | 4.87         | 4.79         | 9.66                      | 6.21          |
| Mean:                                                        |       |           | 38.4          | 4.6          | 5.4          | 10.0                      | 6.2           |
| STDEV:                                                       |       |           | 30.8          |              |              |                           |               |

**Table S2.** Calculated work/energy and distances for SMD simulations of unfolding of A $\beta$ <sub>46</sub> in GS. For each simulation the work/energy is calculated for that frame with the shortest sum of distances of Thr43 (n-3 residue, scissile bond) to the catalytic residues (Asp257 and Asp385). Distances are given in [Å].

| <b>Trimming 2. A<math>\beta</math><sub>46</sub>→A<math>\beta</math><sub>43</sub></b> |              |                  |                      |                     |                     |                                  |                      |
|--------------------------------------------------------------------------------------|--------------|------------------|----------------------|---------------------|---------------------|----------------------------------|----------------------|
| <b>Sim no.</b>                                                                       | <b>Frame</b> | <b>Time [ns]</b> | <b>Work [kJ/mol]</b> | <b>Thr43–Asp257</b> | <b>Thr43–Asp385</b> | <b>Shortest sum of distances</b> | <b>Asp257–Asp385</b> |
| 1                                                                                    | 21           | 6.3              | 25.6                 | 3.74                | 4.81                | 8.55                             | 5.73                 |
| 2                                                                                    | 38           | 11.4             | 57.0                 | 4.09                | 4.43                | 8.52                             | 6.41                 |
| 3                                                                                    | 31           | 9.3              | 90.5                 | 5.44                | 4.69                | 10.13                            | 6.60                 |
| 4                                                                                    | 17           | 5.1              | 17.3                 | 4.24                | 6.19                | 10.43                            | 7.28                 |
| 5                                                                                    | 21           | 6.3              | 49.8                 | 3.76                | 7.13                | 10.89                            | 7.55                 |
| 6                                                                                    | 42           | 12.6             | 69.3                 | 6.17                | 4.04                | 10.21                            | 6.40                 |
| 7                                                                                    | 24           | 7.2              | 28.9                 | 4.35                | 6.12                | 10.47                            | 7.88                 |
| 8                                                                                    | 28           | 8.4              | 40.7                 | 3.83                | 5.93                | 9.76                             | 6.98                 |
| <b>Mean:</b>                                                                         |              |                  | <b>47.4</b>          | <b>4.5</b>          | <b>5.4</b>          | <b>9.9</b>                       | <b>6.9</b>           |
| <b>STDEV:</b>                                                                        |              |                  | <b>24.5</b>          |                     |                     |                                  |                      |

**Table S3.** Calculated work/energy and distances for SMD simulations of unfolding of A $\beta$ <sub>43</sub> in GS. For each simulation the work/energy is calculated for that frame with the shortest sum of distances of Val40 (n-3 residue, scissile bond) to the catalytic residues (Asp257 and Asp385). Distances are given in [Å].

| Trimming 3. A $\beta$ <sub>43</sub> →A $\beta$ <sub>40</sub> |       |           |               |              |              |                           |               |
|--------------------------------------------------------------|-------|-----------|---------------|--------------|--------------|---------------------------|---------------|
| Sim no.                                                      | Frame | Time [ns] | Work [kJ/mol] | Val40–Asp257 | Val40–Asp385 | Shortest sum of distances | Asp257–Asp385 |
| 1                                                            | 30    | 9         | 94.0          | 6.41         | 4.32         | 10.73                     | 4.47          |
| 2                                                            | 40    | 12        | 138.5         | 6.13         | 3.78         | 9.91                      | 5.04          |
| 3                                                            | 17    | 5.1       | 32.7          | 3.83         | 4.67         | 9.34                      | 6.15          |
| 4                                                            | 40    | 12        | 108.0         | 3.02         | 7.15         | 10.17                     | 7.50          |
| 5                                                            | 26    | 7.8       | 47.8          | 4.66         | 4.73         | 9.39                      | 6.44          |
| 6                                                            | 39    | 11.7      | 119.6         | 3.79         | 3.74         | 7.53                      | 5.25          |
| 7                                                            | 31    | 9.3       | 103.8         | 5.64         | 5.18         | 10.82                     | 6.96          |
| 8                                                            | 22    | 6.6       | 49.2          | 3.50         | 6.88         | 10.38                     | 7.49          |
| Mean:                                                        |       |           | 86.7          | 4.6          | 5.1          | 9.8                       | 6.2           |
| STDEV:                                                       |       |           | 38.5          |              |              |                           |               |

**Table S4.** Calculated work/energy and distances for SMD simulations of unfolding of A $\beta$ <sub>40</sub> in GS. For each simulation the work/energy is calculated for that frame with the shortest sum of distances of Gly37 (n-3 residue, scissile bond) to the catalytic residues (Asp257 and Asp385). Distances are given in [Å].

| Trimming 4. A $\beta$ <sub>40</sub> →A $\beta$ <sub>37</sub> |       |           |               |              |              |                           |               |
|--------------------------------------------------------------|-------|-----------|---------------|--------------|--------------|---------------------------|---------------|
| Sim no.                                                      | Frame | Time [ns] | Work [kJ/mol] | Gly37–Asp257 | Gly37–Asp385 | Shortest sum of distances | Asp257–Asp385 |
| 1                                                            | 50    | 15        | 215.1         | 3.09         | 4.83         | 7.92                      | 6.46          |
| 2                                                            | 47    | 14.1      | 170.0         | 4.35         | 4.32         | 8.67                      | 6.96          |
| 3                                                            | 49    | 14.7      | 168.2         | 4.48         | 5.11         | 9.59                      | 6.82          |
| 4                                                            | 44    | 13.2      | 123.7         | 4.61         | 5.87         | 10.48                     | 7.01          |
| 5                                                            | 33    | 9.9       | 129.4         | 4.86         | 5.24         | 10.10                     | 7.58          |
| 6                                                            | 22    | 6.6       | 56.6          | 4.20         | 4.92         | 9.12                      | 5.97          |
| 7                                                            | 40    | 12        | 97.7          | 5.84         | 4.83         | 10.67                     | 7.96          |
| 8                                                            | 50    | 15        | 218.6         | 4.05         | 3.46         | 7.51                      | 5.61          |
| Mean:                                                        |       |           | 147.4         | 4.4          | 4.8          | 9.3                       | 6.8           |
| STDEV:                                                       |       |           | 56.3          |              |              |                           |               |



**Table S5.** Tokens to individual SMD simulations for GS-SMD server results page (<https://gs-smd.biomodellab.eu/results/>). The simulations can be viewed individually or be used for comparisons one on one or in groups on the GS-SMD server.

| Job name                                | Token                                |
|-----------------------------------------|--------------------------------------|
| <b>A<math>\beta</math><sub>40</sub></b> |                                      |
| AB40_GVV_rep1                           | 95ef7a8f-b951-411e-97cc-a5c3a29045fa |
| AB40_GVV_rep2                           | f40bb875-a98e-41db-8b88-bfa29544528d |
| AB40_GVV_rep3                           | ab67d771-f283-4cd2-b73d-20a83e2173b7 |
| AB40_GVV_rep4                           | 6afb5591-d9f9-48bc-a030-6940c64390ea |
| AB40_GVV_rep5                           | 5e9ec51c-d099-4764-90ac-f27a641ad947 |
| AB40_GVV_rep6                           | 4ef9830a-b3fb-4d86-82a5-703a352d7f12 |
| AB40_GVV_rep7                           | a39292af-824a-4d6d-bae2-46bde5fd9a2b |
| AB40_GVV_rep8                           | 5a503f70-6fb1-4251-b4e2-4ace4d238ffe |
| <b>A<math>\beta</math><sub>43</sub></b> |                                      |
| AB43_IAT_rep1                           | ecfb60a4-660c-41b7-827b-0cc6eee7b290 |
| AB43_IAT_rep2                           | da73890b-5c80-4b3c-8d98-a667e8127c9f |
| AB43_IAT_rep3                           | 00d84a03-2b67-485f-9c6e-52c99f2d79fc |
| AB43_IAT_rep4                           | c8cb08dd-e599-43d0-8a10-f01e66e9957b |
| AB43_IAT_rep5                           | afc863d4-370a-447f-a02f-b1e6c25a0d46 |
| AB43_IAT_rep6                           | 29e712aa-78c8-4653-9bda-457a8fa934f4 |
| AB43_IAT_rep7                           | 6033e75a-b41c-4195-94f4-2b3d668904cf |
| AB43_IAT_rep8                           | d3585d02-f0b4-467f-b9c4-6afbb484c450 |
| <b>A<math>\beta</math><sub>46</sub></b> |                                      |
| AB46_VIV_rep1                           | 6b0e09b8-50e4-4f89-9576-7d3a21121b42 |
| AB46_VIV_rep2                           | f59acd4d-b5cc-49cb-9e13-ebb83e7bd094 |
| AB46_VIV_rep3                           | 220ce7db-e0a3-4a4b-aced-c6f2f8feeca2 |
| AB46_VIV_rep4                           | 7b295ea7-87dc-4eec-b233-6c3af362779d |
| AB46_VIV_rep5                           | eeabb493-56e1-434c-b700-0f5d86371398 |
| AB46_VIV_rep6                           | b30239fb-db29-48b7-a572-1c1413af8e71 |
| AB46_VIV_rep7                           | cb98a507-cfc1-424d-967f-fb63b6739337 |
| AB46_VIV_rep8                           | 8d1685e4-0071-47ff-be46-fff1f6df23d1 |
| <b>A<math>\beta</math><sub>49</sub></b> |                                      |
| AB49_ITL_rep1                           | a92905ef-e173-463d-b5c6-a3707fab83f4 |
| AB49_ITL_rep2                           | 833b87a6-4233-487e-8000-3ed19f2b5fd9 |
| AB49_ITL_rep3                           | a2709677-1148-4353-bd09-5ce171f74902 |
| AB49_ITL_rep4                           | 707f4729-8f33-483e-a42e-8f0f78303dc3 |
| AB49_ITL_rep5                           | 4f82cf20-dc22-4a4d-bfa7-fb184141432b |
| AB49_ITL_rep6                           | af47c4bf-9112-44d3-aede-fb2779d49d34 |
| AB49_ITL_rep7                           | f4ea2889-911a-4592-b597-15763d7939c5 |
| AB49_ITL_rep8                           | 1e7f0b23-ab59-4f77-ac08-d1947c0711b1 |
